# Supplementary material for: Targeted inhibition of GRK2 kinase domain by CP-25 to reverse fibroblast-like synoviocytes dysfunction and improve collagen-induced arthritis in rats
Source: PubMed Central journal article supplement — Acta Pharm Sin B. 2021 Jan 23;11(7):1835–52. doi: 10.1016/j.apsb.2021.01.015 (PMC8343125; doi:10.1016/j.apsb.2021.01.015), 2021-01-23
Supplement: mmc1.pdf [file mmc1.pdf]

## Supporting Information for

### Original article

#### **Targeted inhibition of GRK2 kinase domain by CP-25 to reverse fibroblast-like synoviocytes dysfunction and improve collagen-induced arthritis in rats**

**Chenchen Han<sup>a,b</sup>, Yifan Li<sup>a</sup>, Yuwen Zhang<sup>a</sup>, Yang Wang<sup>a</sup>, Dongqian Cui<sup>a</sup>, Tingting Luo<sup>a</sup>, Yu Zhang<sup>a</sup>, Qian Liu<sup>a</sup>, Hao Li<sup>a</sup>, Chun Wang<sup>a</sup>, Dexiang Xu<sup>b,\*</sup>, Yang Ma<sup>a,\*</sup>, Wei Wei<sup>a,\*</sup>**

<sup>a</sup>*Institute of Clinical Pharmacology, Anhui Medical University, Key Laboratory of Anti-Inflammatory and Immune Medicine (Anhui Medical University), Ministry of Education, Anhui Collaborative Innovation Center of Anti-inflammatory and Immune Medicine, Hefei 230032, China*

<sup>b</sup>*Public Health and Preventive Medicine Postdoctoral Research Station of Anhui Medical University, Hefei 230032, China*

Received 9 November 2020; received in revised form 28 December 2020; accepted 6 January 2021

\*Corresponding authors. Tel.: +86 551 65161209; Fax: +86 551 65161209.

E-mail addresses: wwei@ahmu.edu.cn (Wei Wei), mayang\_ahmu@126.com (Yang Ma), xudex@126.com (Dexiang Xu).

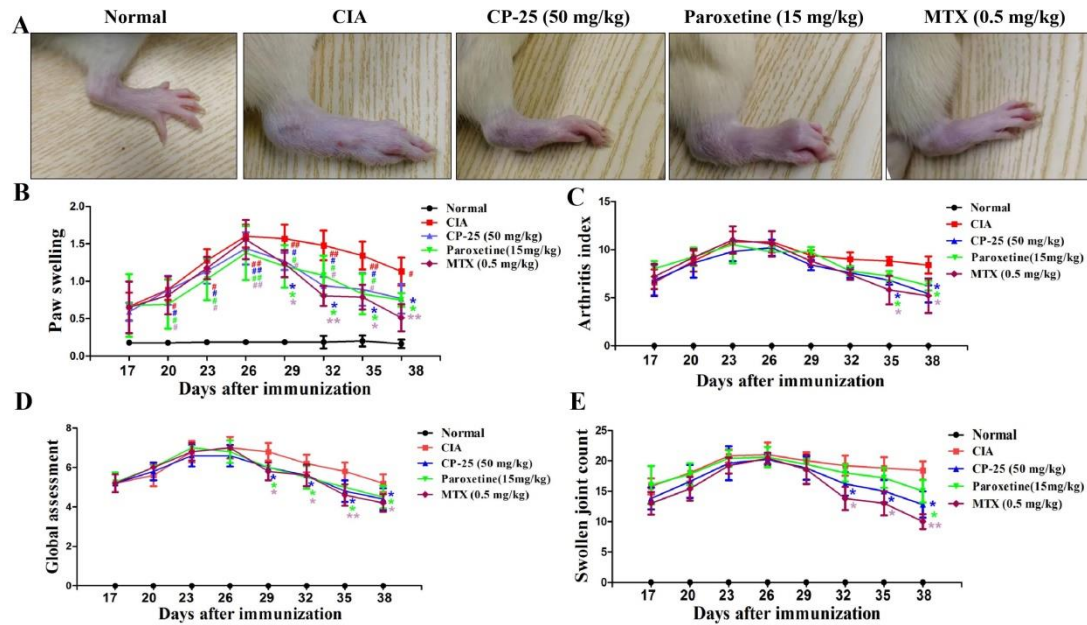

**Figure S1** CP-25 treatment obviously attenuates the manifestation of CIA rats. Successfully establishing CIA rats model, CP-25 (50 mg/kg/day), paroxetine (15 mg/kg/day), and MTX (0.5 mg/kg/3 days) with continuous administration for 21 days, and meanwhile there were age-matched normal control groups. The onset of assess was on around Day 17 after the first injection. The representative pictures of swelling joints were presented (A). Paw swelling (B), arthritis index (C), global assessment (D), swollen joints count (E) were evaluated following the published standard. The grading scheme consisted of ordinal categories ranging from 0 (no effect) to 3 (severe effect). Data are expressed as mean  $\pm$  SD.  $^{\#}P < 0.05$ ,  $^{\#\#}P < 0.01$  vs. normal group;  $^{*}P < 0.05$ ,  $^{**}P < 0.01$  vs. CIA group ( $\bar{x} \pm s$ ,  $n = 6\sim 8$ ).

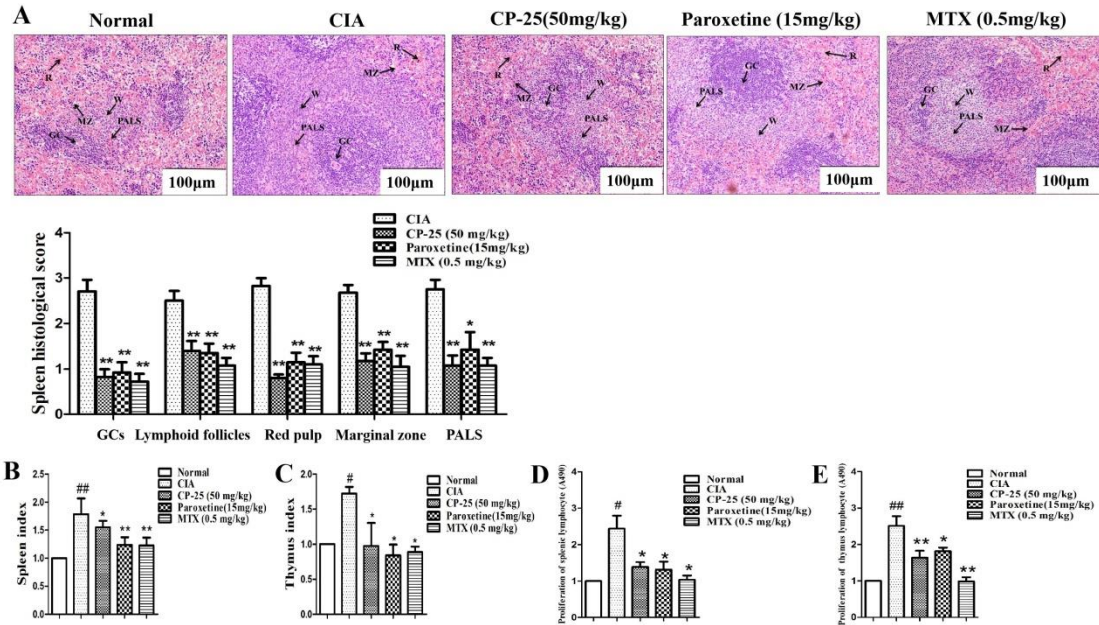

**Figure S2** CP-25 treatment improves spleen and thymus function of CIA rats. (A) Representative micrographs of HE-stained histological sections of the spleens are shown. The histology section shows the red pulp (R), the marginal zone (MZ), the germinal centre (GC), and the periarteriolar lymphoid sheaths (PALS). The grading scheme consisted of ordinal categories ranging from 0 (no effect) to 3 (severe effect). Scale bars = 100 μm. (B) and (C) Effects of CP-25 on spleen index (B) and thymus index (C) of CIA rats. (D) and (E) Effects of CP-25 on proliferation of splenic lymphocyte (D) and thymus lymphocyte (E) in CIA rats. Data are expressed as mean  $\pm$  SD.  $^{\#}P < 0.05$ ,  $^{##}P < 0.01$  vs. Normal group;  $^{*}P < 0.05$ ,  $^{**}P < 0.01$  vs. CIA group ( $\bar{x} \pm s$ ,  $n = 6$ ).

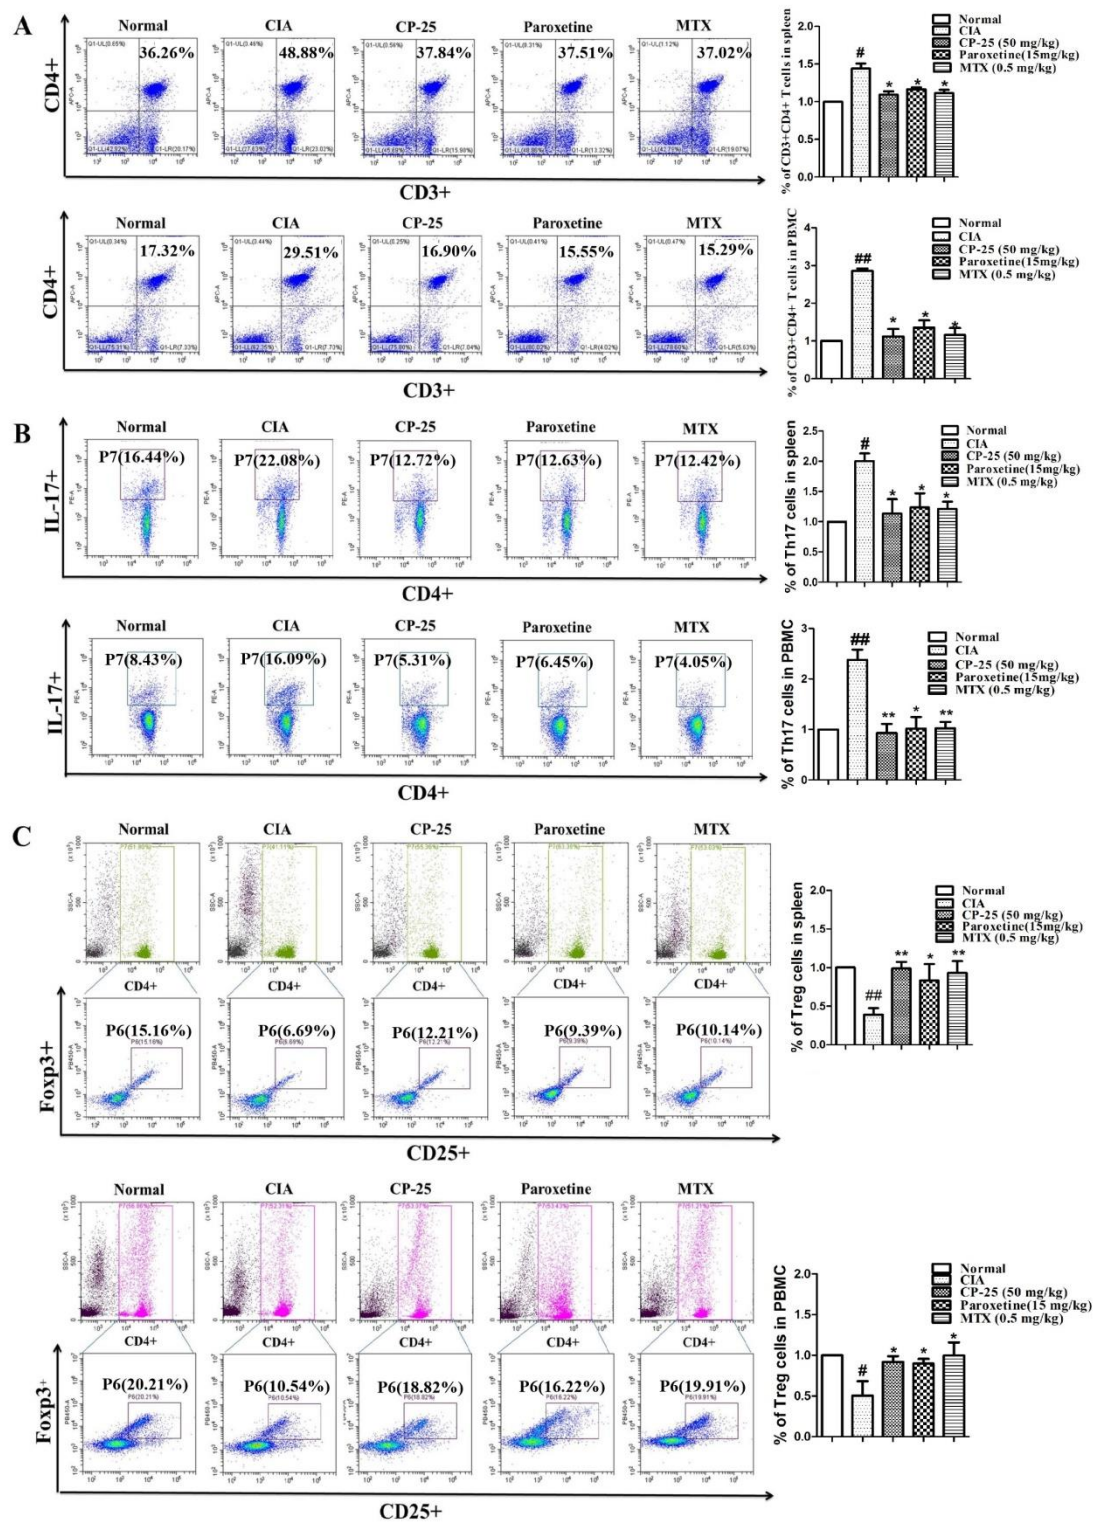

**Figure S3** CP-25 treatment regulates the percentage of T cells in PBMC and spleen of CIA rats. Flow cytometry was used to detect the percentage of CD3<sup>+</sup>CD4<sup>+</sup> T cells (A), Th17 (B) and Treg cells (C) in spleen and PBMC of CIA rats. Data are expressed as mean  $\pm$  SD. #*P* < 0.05, ##*P* < 0.01 vs. Normal group; \**P* < 0.05, \*\**P* < 0.01 vs. CIA group ( $\bar{x} \pm s, n = 6$ ).

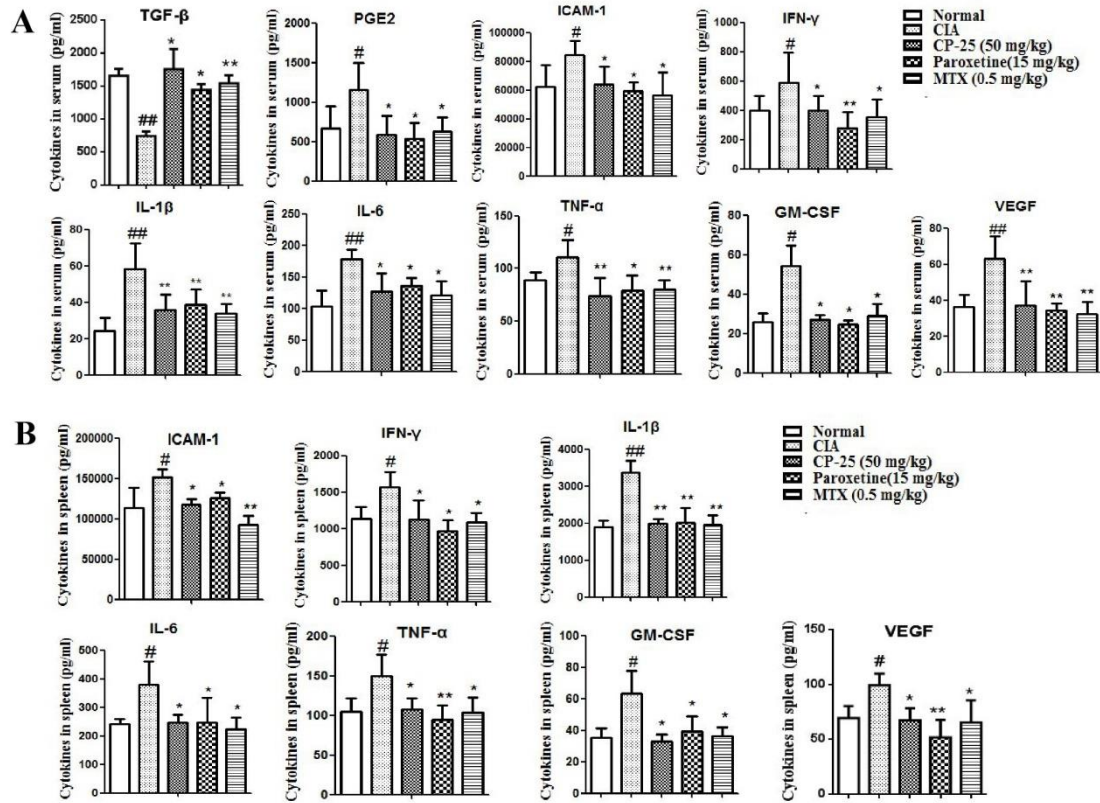

**Figure S4** CP-25 treatment regulated cytokines serum and spleen of CIA rats. PGE2, TNF- $\alpha$ , IFN- $\gamma$ , TGF- $\beta$ , VEGF, ICAM-1, IL-1 $\beta$ , GM-CSF and IL-6 cytokines level in serum (A) and spleen (B) of CIA rats. Data are expressed as mean  $\pm$  SD. # $P$  < 0.05, ## $P$  < 0.01 vs. normal group; \* $P$  < 0.05, \*\* $P$  < 0.01 vs. CIA group ( $\bar{x} \pm s$ ,  $n = 6$ ).

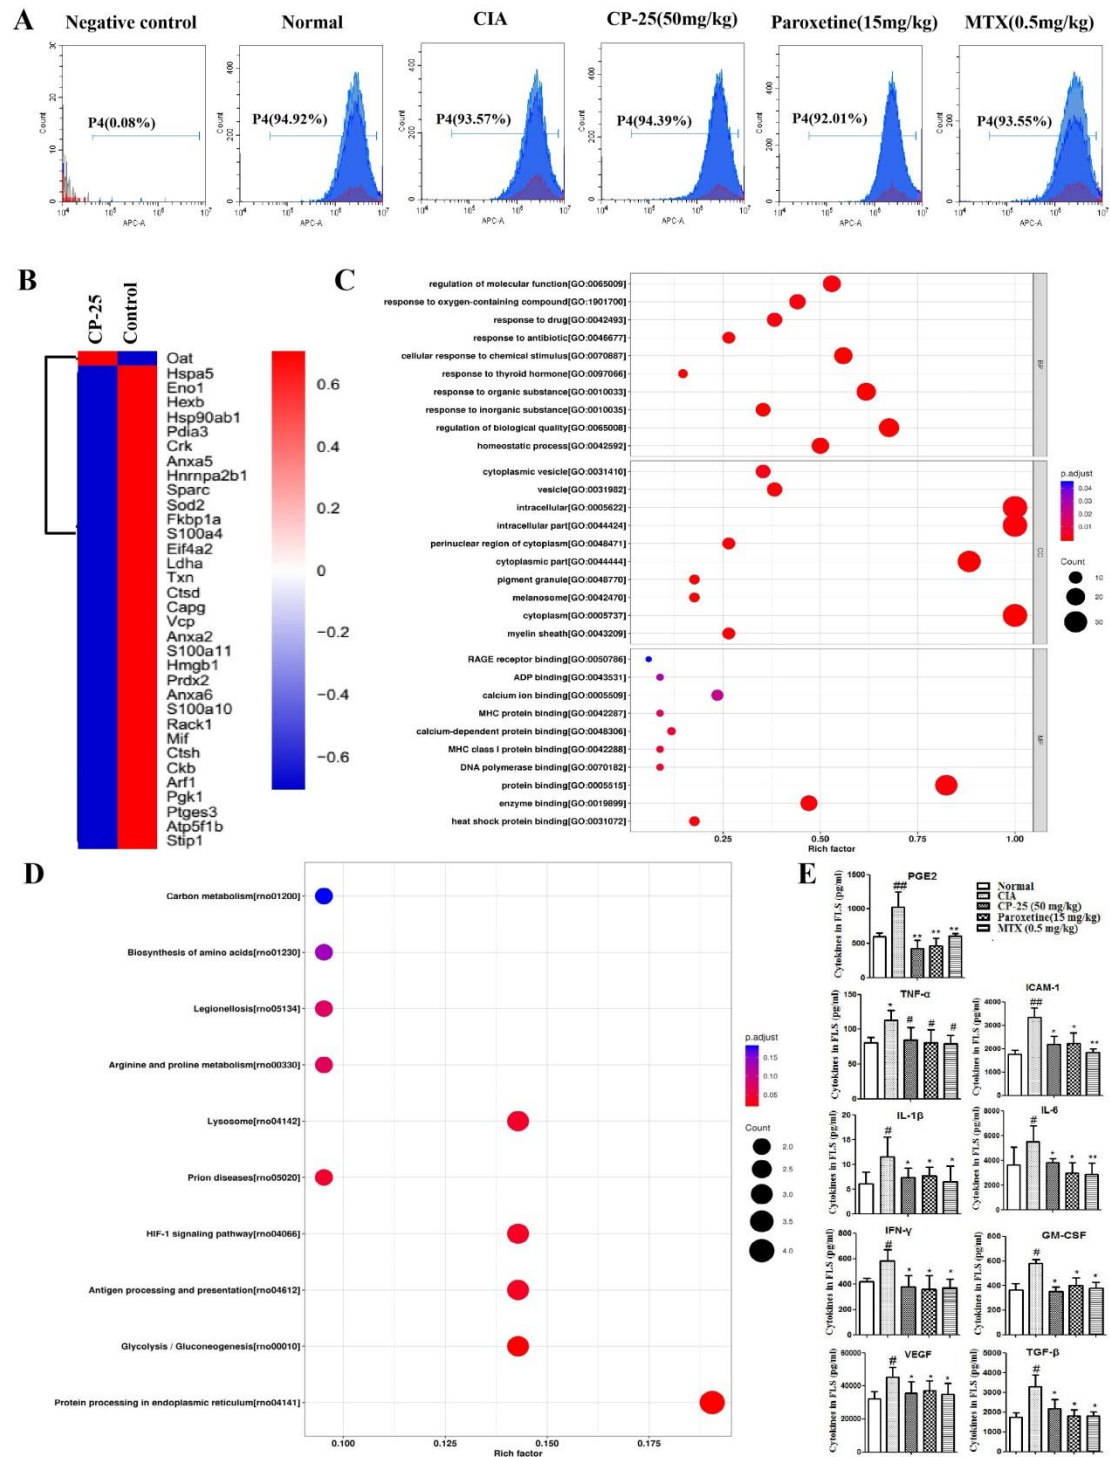

**Figure S5** Identification of target proteins in FLS for CP-25. (A) The FLS of CIA rats were identified by flow cytometry ( $n = 4$ ). (B) Thermodynamic diagram of differentially expressed proteins by hierarchical cluster analysis. (C) GO enrichment analysis. BP: biological process; MF: molecular function; CC: cellular component. The X-axis represents the Rich factor value of the degree of enrichment. The size of the circle indicates the number of differentially expressed proteins mapped, and the

larger the circle, the more the number. The color represents the significance of enrichment, the redder the color, the smaller the  $P$  value. (D) KEGG pathway enrichment analysis. The  $X$ -axis represents the Rich factor value of the degree of enrichment. The size of the circle indicates the number of differentially expressed proteins mapped, and the larger the circle, the more the number. The color represents the significance of enrichment, the redder the color, the smaller the  $P$  value. (E) CP-25 modulates cytokines production in the supernatant fluid of FLS ( $n = 6$ ). Data are expressed as mean  $\pm$  SD.  $^{\#}P < 0.05$ ,  $^{##}P < 0.01$  vs. normal group;  $*P < 0.05$ ,  $**P < 0.01$  vs. CIA group.
